# Supplementary material
Source: Springer Nature journal article supplement (https://www.springermedizin.de/resource/supplementary/12871_2013_375_MOESM3_ESM.pdf/9429024)

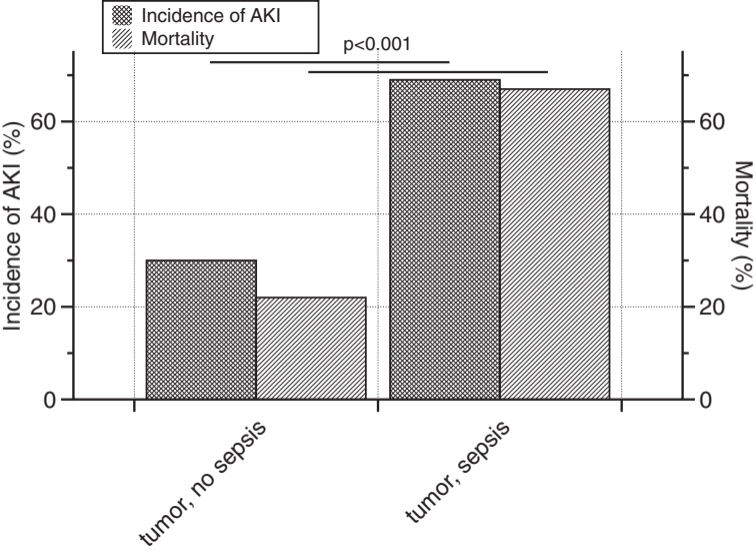

Supplement: MOESM3 [file 9429024]
